# Supplementary material
Source: HighWire-hosted journal article supplement (https://erj.ersjournals.com/content/55/5/1902412)
Supplement: inline-supplementary-material-1 [file inline-supplementary-material-1.pdf]

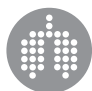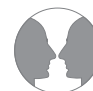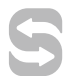

SHAREABLE PDF

# Evaluating the sensitivity and specificity of NEATstik technology compared to an activity-based immunoassay in sputum samples from participants with COPD

Samantha J. Thulborn<sup>1,2</sup>, Jennifer L. Cane<sup>1,2</sup>, Clare Connolly<sup>1,2</sup>, Catherine Borg<sup>1,2</sup>, Kelly L. Moffitt<sup>3</sup>, David Ribeiro<sup>3</sup>, Charlene Robb<sup>3</sup>, Richard E. K. Russell <sup>1</sup> and Mona Bafadhel<sup>1</sup>

**Affiliations:** <sup>1</sup>Respiratory Medicine Unit, Nuffield Dept of Medicine, University of Oxford, Oxford, UK. <sup>2</sup>Oxford NIHR Biomedical Research Centre, University of Oxford, Oxford, UK. <sup>3</sup>ProAxis Ltd, Belfast, UK.

**Correspondence:** Mona Bafadhel, University of Oxford, Dept of Respiratory Medicine, Nuffield Dept of Medicine, Old Road Campus, Oxford, OX3 7FZ, UK. E-mail: mona.bafadhel@ndm.ox.ac.uk

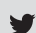

@ERSpublications

NEATstik is a point of care test which gives a qualitative result on whether neutrophil elastase is elevated from sputum in 10 min with minimal processing and could be of benefit in clinical practice <http://bit.ly/2SohUhf>

**Cite this article as:** Thulborn SJ, Cane JL, Connolly C, *et al.* Evaluating the sensitivity and specificity of NEATstik technology compared to an activity-based immunoassay in sputum samples from participants with COPD. *Eur Respir J* 2020; 55: 1902412 [<https://doi.org/10.1183/13993003.02412-2019>].

This single-page version can be shared freely online.

## To the Editor:

Chronic bacterial infection may play an important role in the progression of COPD [1] with the pulmonary inflammatory response driven by neutrophils [2]. Neutrophil elastase (NE) is a serine protease stored and secreted by neutrophils [3] and is an essential defence against bacterial infection [4]. Proteases are produced and stored in the latent form and are only activated upon appropriate signalling [5]. Active sputum NE is a potential biomarker for infection in several respiratory diseases including, but not limited to, cystic fibrosis, COPD and bronchiectasis [6–10], with levels correlating to bacterial infection [11] and future risk of exacerbations in patients with bronchiectasis [12]. NE has been shown to be active in host defence against bacteria [4], both intracellularly and *via* extracellular traps [13]. NEATstik is a point of care test for NE which gives a qualitative result from sputum in 10 min with minimal processing. This may benefit clinical practice as a rapid indicator of bacterial infection and neutrophil activation.
